# Supplementary material for: Measuring physical, cognitive, and emotional aspects of exhaustion with the BOSS II-short version – results from a representative population-based study in Germany
Source: Springer Nature journal article supplement (doi:10.1186/s12889-022-12961-z), 2022-03-24
Supplement: MOESM1 [file 20250476]

**Additional file 1**

**Supplementary Table 1**

*Normative percentile ranks for the BOSS II-short for female participants*

| Sum<br>Score | Age in years    |     |     |                 |     |     |                 |     |     |                 |     |     |                 |     |     |                |     |     |
|--------------|-----------------|-----|-----|-----------------|-----|-----|-----------------|-----|-----|-----------------|-----|-----|-----------------|-----|-----|----------------|-----|-----|
|              | 18-29 (n = 191) |     |     | 30-39 (n = 168) |     |     | 40-49 (n = 255) |     |     | 50-59 (n = 242) |     |     | 60-69 (n = 211) |     |     | ≥ 70 (n = 219) |     |     |
|              | P               | C   | E   | P               | C   | E   | P               | C   | E   | P               | C   | E   | P               | C   | E   | P              | C   | E   |
| 0            | 54              | 57  | 39  | 40              | 57  | 34  | 24              | 46  | 32  | 18              | 47  | 28  | 13              | 41  | 35  | 6              | 26  | 21  |
| 1            | 66              | 68  | 52  | 53              | 66  | 49  | 40              | 59  | 49  | 26              | 56  | 40  | 19              | 55  | 45  | 8              | 36  | 36  |
| 2            | 79              | 75  | 66  | 70              | 73  | 64  | 52              | 66  | 61  | 41              | 64  | 56  | 26              | 65  | 58  | 16             | 44  | 50  |
| 3            | 82              | 83  | 72  | 77              | 80  | 73  | 64              | 73  | 68  | 52              | 71  | 65  | 36              | 71  | 68  | 24             | 52  | 58  |
| 4            | 85              | 88  | 79  | 83              | 85  | 80  | 71              | 78  | 74  | 62              | 74  | 70  | 48              | 76  | 75  | 32             | 57  | 64  |
| 5            | 88              | 90  | 83  | 88              | 88  | 84  | 78              | 83  | 78  | 69              | 79  | 74  | 57              | 80  | 82  | 39             | 65  | 70  |
| 6            | 92              | 91  | 87  | 90              | 90  | 86  | 84              | 87  | 81  | 77              | 84  | 79  | 66              | 82  | 84  | 53             | 71  | 74  |
| 7            | 93              | 93  | 90  | 92              | 91  | 89  | 89              | 90  | 86  | 83              | 86  | 83  | 74              | 88  | 85  | 63             | 75  | 78  |
| 8            | 95              | 95  | 92  | 93              | 93  | 90  | 91              | 94  | 89  | 86              | 90  | 85  | 80              | 91  | 88  | 70             | 79  | 82  |
| 9            | 96              | 98  | 93  | 96              | 95  | 91  | 94              | 96  | 91  | 90              | 92  | 89  | 88              | 94  | 91  | 74             | 85  | 85  |
| 10           | 97              | 98  | 95  | 97              | 96  | 92  | 96              | 97  | 93  | 91              | 93  | 91  | 91              | 95  | 94  | 80             | 87  | 88  |
| 11           | 97              | 98  | 96  | 97              | 97  | 94  | 97              | 97  | 94  | 93              | 94  | 93  | 93              | 96  | 96  | 86             | 89  | 89  |
| 12           | 99              | 99  | 96  | 98              | 97  | 96  | 97              | 98  | 95  | 93              | 97  | 94  | 94              | 97  | 97  | 90             | 92  | 91  |
| 13           | 99              | 99  | 98  | 99              | 98  | 96  | 97              | 98  | 96  | 96              | 98  | 94  | 95              | 97  | 98  | 93             | 93  | 93  |
| 14           | 99              | 99  | 98  | 100             | 98  | 98  | 98              | 98  | 97  | 97              | 98  | 95  | 95              | 99  | 99  | 93             | 94  | 95  |
| 15           | 99              | 100 | 99  |                 | 98  | 98  | 98              | 100 | 98  | 98              | 99  | 96  | 96              | 100 | 99  | 95             | 95  | 96  |
| 16           | 99              |     | 99  |                 | 99  | 98  | 99              | 100 | 99  | 99              | 99  | 98  | 97              | 100 | 99  | 97             | 96  | 97  |
| 17           | 99              |     | 99  |                 | 99  | 98  | 99              |     | 99  | 100             | 99  | 98  | 98              | 100 | 100 | 97             | 98  | 99  |
| 18           | 99              |     | 100 |                 | 99  | 99  | 99              |     | 100 | 100             | 99  | 99  | 99              | 100 | 100 | 97             | 98  | 99  |
| 19           | 100             |     |     |                 | 99  | 99  | 100             |     | 100 | 100             | 99  | 99  | 100             | 100 | 100 | 98             | 99  | 99  |
| 20           |                 |     |     |                 | 99  | 99  | 100             |     |     | 100             | 100 | 99  | 100             | 100 | 100 | 99             | 99  | 99  |
| 21           |                 |     |     |                 | 99  | 99  | 100             |     |     | 100             | 100 | 100 |                 |     | 100 | 100            | 99  | 99  |
| 22           |                 |     |     |                 | 100 | 99  | 100             |     |     | 100             | 100 | 100 |                 |     | 100 |                | 99  | 100 |
| 23           |                 |     |     |                 |     | 100 |                 |     |     |                 | 100 | 100 |                 |     |     |                | 99  | 100 |
| 24           |                 |     |     |                 |     |     |                 |     |     |                 |     | 100 |                 |     |     |                | 100 | 100 |
| 25           |                 |     |     |                 |     |     |                 |     |     |                 |     |     |                 |     |     |                | 100 |     |

*Note.* P= Physical, C= Cognitive, E= Emotional

## Supplementary Table 2

Normative percentile ranks for the BOSS II-short for *male* participants

| Sum Score | Age in years            |     |     |                         |     |     |                         |     |     |                         |     |     |                         |     |     |                        |     |     |
|-----------|-------------------------|-----|-----|-------------------------|-----|-----|-------------------------|-----|-----|-------------------------|-----|-----|-------------------------|-----|-----|------------------------|-----|-----|
|           | 18-29 ( <i>n</i> = 174) |     |     | 30-39 ( <i>n</i> = 166) |     |     | 40-49 ( <i>n</i> = 226) |     |     | 50-59 ( <i>n</i> = 205) |     |     | 60-69 ( <i>n</i> = 182) |     |     | ≥ 70 ( <i>n</i> = 190) |     |     |
|           | P                       | C   | E   | P                       | C   | E   | P                       | C   | E   | P                       | C   | E   | P                       | C   | E   | P                      | C   | E   |
| 0         | 60                      | 62  | 47  | 43                      | 56  | 37  | 30                      | 54  | 39  | 22                      | 54  | 40  | 12                      | 45  | 38  | 11                     | 24  | 32  |
| 1         | 72                      | 74  | 63  | 58                      | 66  | 51  | 39                      | 64  | 51  | 33                      | 62  | 54  | 16                      | 58  | 54  | 16                     | 32  | 45  |
| 2         | 79                      | 80  | 77  | 73                      | 75  | 67  | 54                      | 72  | 69  | 51                      | 70  | 60  | 31                      | 69  | 66  | 24                     | 44  | 58  |
| 3         | 84                      | 82  | 79  | 81                      | 80  | 75  | 64                      | 76  | 74  | 60                      | 79  | 70  | 42                      | 75  | 77  | 33                     | 52  | 66  |
| 4         | 89                      | 84  | 84  | 86                      | 85  | 81  | 75                      | 81  | 79  | 70                      | 85  | 76  | 52                      | 82  | 82  | 42                     | 66  | 76  |
| 5         | 90                      | 86  | 87  | 92                      | 93  | 87  | 84                      | 85  | 82  | 77                      | 88  | 80  | 63                      | 87  | 85  | 55                     | 73  | 80  |
| 6         | 91                      | 89  | 90  | 94                      | 95  | 89  | 86                      | 87  | 86  | 82                      | 91  | 83  | 73                      | 90  | 89  | 63                     | 81  | 82  |
| 7         | 95                      | 93  | 91  | 95                      | 96  | 93  | 90                      | 88  | 88  | 87                      | 91  | 86  | 79                      | 92  | 90  | 69                     | 85  | 86  |
| 8         | 97                      | 93  | 91  | 96                      | 96  | 94  | 92                      | 91  | 89  | 90                      | 93  | 89  | 87                      | 93  | 91  | 76                     | 91  | 88  |
| 9         | 98                      | 95  | 93  | 96                      | 96  | 96  | 94                      | 93  | 91  | 91                      | 93  | 91  | 90                      | 95  | 93  | 81                     | 93  | 90  |
| 10        | 99                      | 97  | 95  | 96                      | 96  | 97  | 95                      | 94  | 93  | 92                      | 96  | 92  | 93                      | 96  | 93  | 84                     | 95  | 93  |
| 11        | 99                      | 99  | 95  | 97                      | 97  | 98  | 97                      | 95  | 95  | 93                      | 98  | 95  | 95                      | 97  | 94  | 89                     | 96  | 94  |
| 12        | 99                      | 100 | 97  | 97                      | 98  | 98  | 97                      | 96  | 96  | 93                      | 98  | 95  | 96                      | 97  | 95  | 92                     | 96  | 95  |
| 13        | 99                      |     | 98  | 99                      | 98  | 99  | 98                      | 96  | 96  | 95                      | 98  | 97  | 96                      | 98  | 96  | 97                     | 98  | 97  |
| 14        | 100                     |     | 98  | 99                      | 98  | 99  | 98                      | 97  | 96  | 96                      | 99  | 97  | 97                      | 99  | 96  | 97                     | 98  | 98  |
| 15        |                         |     | 99  | 99                      | 99  | 99  | 99                      | 98  | 97  | 96                      | 100 | 98  | 97                      | 100 | 97  | 97                     | 99  | 98  |
| 16        |                         |     | 100 | 100                     | 100 | 100 | 99                      | 98  | 98  | 98                      | 100 | 98  | 98                      |     | 98  | 98                     | 99  | 98  |
| 17        |                         |     |     |                         |     |     | 99                      | 99  | 99  | 99                      | 100 | 99  | 99                      |     | 99  | 98                     | 100 | 99  |
| 18        |                         |     |     |                         |     |     | 99                      | 99  | 99  | 99                      | 100 | 100 | 99                      |     | 99  | 99                     |     | 100 |
| 19        |                         |     |     |                         |     |     | 99                      | 100 | 100 | 99                      | 100 |     | 100                     |     | 100 | 99                     |     |     |
| 20        |                         |     |     |                         |     |     | 100                     |     | 100 | 100                     | 100 |     |                         |     |     | 99                     |     |     |
| 21        |                         |     |     |                         |     |     | 100                     |     |     | 100                     |     |     |                         |     |     | 100                    |     |     |
| 22        |                         |     |     |                         |     |     |                         |     |     |                         |     |     |                         |     |     |                        |     |     |
| 23        |                         |     |     |                         |     |     |                         |     |     |                         |     |     |                         |     |     |                        |     |     |
| 24        |                         |     |     |                         |     |     |                         |     |     |                         |     |     |                         |     |     |                        |     |     |
| 25        |                         |     |     |                         |     |     |                         |     |     |                         |     |     |                         |     |     |                        |     |     |

Note. P= Physical, C= Cognitive, E= Emotional
